# Supplementary material for: Attentional priorities drive effects of time pressure on altruistic choice
Source: PubMed Central journal article supplement (PMC7363879; doi:10.1038/s41467-020-17326-x), 2020-07-15
Supplement: 41467_2020_17326_MOESM1_ESM.pdf [file 41467_2020_17326_MOESM1_ESM.pdf]

1  
2  
3  
4  
5  
6  
7  
8  
9  
10  
11  
12  
13  
14  
15  
16  
17  
18  
19

**Supplementary Information for**  
“Attentional priorities drive effects of time pressure on altruistic choice”

Yi Yang Teoh, Ziqing Yao, William A. Cunningham, Cendri A. Hutcherson

## 20 **Supplementary Notes**

### 21 **Supplementary Note 1**

22           To confirm the robustness of the behavioral findings reported in Study 1, we ran three  
23 behavioural replications of Study 1. Replication studies 1A (N=34) and 1B (N=31) resembled  
24 our Study 1, with the following differences. Participants completed 200 trials of the modified  
25 dictator game as in the Study 1. However, to ensure that effects were not driven by the left-right  
26 positioning of decision attributes (\$Self & \$Other), attributes were presented vertically arranged  
27 in the center of the screen with either \$Self or \$Other on top. In Study 1A (1B), the high time  
28 pressure response window was 2s (1.5s). In both studies, participants in the free response  
29 condition were only instructed to choose within 10s and not explicitly encouraged to delay  
30 responses. Finally, in Study 1A, the scale of the monetary offers range from \$0 to \$20.  
31 Generous choices did not vary as a function of the study variant coded as a dummy variable ( $b =$   
32  $-0.0463$ ,  $SE = 0.2588$ ,  $z = -0.179$ ,  $p = .86$ ) or moderate the effect of the time pressure conditions  
33 ( $b = 0.0407$ ,  $SE = 0.0768$ ,  $z = 0.530$ ,  $p = .60$ ). We thus collapsed results of these two studies for  
34 analyses. In replication Study 2, participants (N=49) completed 200 trials of the modified  
35 dictator game, with \$Self and \$Other displayed on the right and left of the screen exactly as in  
36 the Study 1, but in the absence of eye-tracking to ensure that effects were not driven by a  
37 measurement of eye-movements. All other details of the experimental paradigms were identical  
38 to Study 1.

39           As expected, we replicated the effects of time pressure on reaction times (Replication  
40 Study 1:  $M_{\text{high}}=0.799\text{s}$ ,  $M_{\text{low}}=1.071\text{s}$ ,  $SE_{\text{diff}}=0.033\text{s}$ ,  $t_{64}=-8.284$ ,  $p<.001$ ; Replication Study 2:  
41  $M_{\text{high}}=0.742\text{s}$ ,  $M_{\text{low}}=3.420\text{s}$ ,  $SE_{\text{diff}}=0.117\text{s}$ ,  $t_{48}=-22.807$ ,  $p < .001$ ). However, while Study 1  
42 reported a small but significant decrease in generosity under time pressure, this effect failed to

43 replicate in our replication studies (Replication Study 1:  $M_{\text{high}} = 0.440$ ,  $M_{\text{low}} = 0.437$ ,  $SE_{\text{diff}} =$   
44  $0.007$ ,  $t_{64} = 0.4114$ ,  $p = .68$ ; Replication Study 2:  $M_{\text{high}} = 0.424$ ,  $M_{\text{low}} = 0.442$ ,  $SE_{\text{diff}} = 0.011$ ,  $t_{48}$   
45  $= -1.475$ ,  $p = .15$ ).

46         However, importantly, we replicated the main correlational analyses demonstrating  
47 robust individual differences in changes in generosity under time pressure. We show again that  
48 generosity under low time pressure predicted changes in generosity with time (Replication Study  
49 1: Pearson's  $r = -0.286$ ,  $t_{63} = -2.370$ ,  $p < .05$ ; Replication Study 2: Pearson's  $r = -0.300$ ,  $t_{47} = -$   
50  $2.154$ ,  $p < .05$ ) and generosity under low time pressure was not associated with changes in  
51 generosity (Replication Study 1: Pearson's  $r = 0.004$ ,  $t_{63} = 0.0322$ ,  $p = .97$ ; Replication Study 2:  
52 Pearson's  $r = 0.083$ ,  $t_{47} = 0.570$ ,  $p = .57$ ). These consistent effects strongly support our  
53 interpretation that biases in early attention may drive choice biases under time pressure that  
54 become attenuated with more time.

55

## 56 **Supplementary Note 2**

57           In this paper, we proposed that time pressure produced choice biases that differed  
58 between individuals by showing that extreme choice biases under time pressure were attenuated  
59 with time. We demonstrated this effect by correlating the proportion generosity under high time  
60 pressure with change in proportion generosity from high time pressure to low time pressure  
61 (Study 1: Pearson's  $r = -0.313$ ,  $t_{58} = 2.513$ ,  $p = .0148$ ; Replication Study 1: Pearson's  $r = -0.286$ ,  
62  $t_{63} = -2.3702$ ,  $p = .021$ ; Replication Study 2: Pearson's  $r = -0.300$ ,  $t_{47} = -2.1537$ ,  $p = .036$ ).

63           To rule out the possibility that these effects were due to regression towards the mean, we  
64 conducted three additional analyses. First, to illustrate that our measures of generosity were  
65 relatively precise, we conducted tests of reliability across blocks of our experiments since  
66 regression to the mean is most likely to occur when variability in the measures is high. Notably,  
67 we found excellent reliability across blocks in generosity estimates for each condition in Study 1  
68 (High time pressure: Cronbach's  $\alpha$  [95% CI] = 0.94 [0.91, 0.96]; Low time pressure:  $\alpha = 0.93$   
69 [0.90, 0.96]), Replication Study 1 (High time pressure:  $\alpha = 0.93$  [0.91, 0.96]; Low time pressure:  
70  $\alpha = 0.92$  [0.90, 0.95]) and 2 (High time pressure:  $\alpha = 0.95$  [0.93, 0.97]; Low time pressure:  $\alpha =$   
71  $0.95$  [0.92, 0.97]). This strongly suggests that measures of generosity within the paradigm are  
72 stable and vary minimally across measurement within an individual, reducing the likelihood of  
73 regression towards the mean.

74           Secondly, we re-ran the same correlational analyses we performed on the full set of trials  
75 investigating the association between generosity under high time pressure and change in  
76 generosity with time, but now separately for each block. Given that regression to the mean  
77 emerges as a function of random variability in measurement, it would be unlikely to produce  
78 consistent effects. Instead, we found overwhelming consistency in the pattern of effects across

79 all blocks (Study 1: mean Pearson's  $r = -0.366$ , all  $ps < .01$ ; Replication Study 1: mean Pearson's  
80  $r = -0.401$ , all  $ps < .05$ ; Replication Study 2: mean Pearson's  $r = -0.358$ , all  $ps < .05$ ). Given the  
81 robustness of this correlation, we think it is highly unlikely that random variability in estimates  
82 resulting in regression to the mean would exhibit such consistency across multiple tests and  
83 experiments.

84 Finally, we also performed an even stronger test of regression to the mean vs. our  
85 favoured hypothesis. Assumptions of regression to the mean suggest that the strongest drivers of  
86 the effect would be the most extreme predictors (since these are the observations that can shift  
87 the most towards the mean). In contrast, our prioritized attention model suggests that the most  
88 extreme individuals (ones who attend 100% of the time to self or to other exclusively) should  
89 actually be *least* likely to shift in a more moderate direction, since they are better able to  
90 implement their true preferences. It should actually be the individuals who give at least *some*  
91 weight to the secondary attribute, and attend to it when given enough time, who show the most  
92 change. Thus, the regression to the mean explanation suggests that observed associations  
93 between generosity and change due to time pressure should get weaker when the most extreme  
94 individuals are excluded, whereas our model predicts that this association should stay the same,  
95 or if anything get stronger. To test these two distinct possibilities, we ran a follow-up analysis  
96 excluding participants who were  $< 25\%$  generous or  $> 75\%$  generous under time pressure.  
97 Instead of attenuating the original effect (Study 1: Pearson's  $r = -0.313$ ,  $t_{58} = 2.513$ ,  $p = .0148$ ;  
98 Replication Study 1: Pearson's  $r = -0.286$ ,  $t_{63} = -2.3702$ ,  $p = .021$ ; Replication Study 2: Pearson's  
99  $r = -0.300$ ,  $t_{47} = -2.1537$ ,  $p = .036$ ), we find that the effect becomes stronger when excluding the  
100 participants most likely to regress towards the mean (Study 1: Pearson's  $r = -0.490$ ,  $t_{35} = -3.326$ ,  
101  $p = .0021$ ; Replication Study 1: Pearson's  $r = -0.408$ ,  $t_{52} = -3.221$ ,  $p = .0022$ ; Replication Study

102 2: Pearson's  $r = -0.522$ ,  $t_{32} = -3.459$ ,  $p = .0016$ ).

103           This effect is fully consistent with our subsequent analyses that show individuals' gaze-  
104 biases to be particularly important in mediating this effect. For example, extremely selfish  
105 individuals typically make consistently selfish choices under low time pressure as an expression  
106 of their selfish social preferences. Under high time pressure, they are also likely to search  
107 exclusively for their own outcomes first, ensuring that their selfish preferences are sustained and  
108 expressed. Thus, we observe no change in their behavior. In contrast, moderately selfish  
109 individuals, while still preferring to maximize their own outcomes, also give some attention to  
110 others' outcomes under low time pressure. Under high time pressure however, because they are  
111 more likely to search for their own outcomes first, and then have little time to acquire and  
112 process the other person's outcomes, their choices become more extreme reflections of their  
113 underlying preferences.

114           Furthermore, our model cross-validation reported in the main paper strongly suggests that  
115 individual-level parameters estimated from half of the data is sufficient to predict patterns of  
116 change in choice behavior under time pressure in an out-of-sample dataset. These systematic  
117 associations between social preferences, attention and choice would be highly unlikely in an  
118 account of choice that simply assumes regression to the mean.

119

### 120 **Supplementary Note 3**

121           In this paper, we conducted continuous analyses of eye-gaze to illustrate the effects of  
122 time pressure on early attention and its subsequent influences on generous choice. To  
123 demonstrate the robustness of these results, we attempted to replicate all relevant analyses using  
124 first fixation position as a measure of early attention. Using a fixation threshold of 100ms, we  
125 extracted which information – self or other – participants looked at first in each trial. Logistic  
126 mixed-effects regression predicting first fixation position (0: other-information, 1: self-  
127 information) by time pressure condition reveals a significant main effect of time pressure ( $b =$   
128  $0.783$ ,  $SE = 0.062$ ,  $z = 12.702$ ,  $p < .001$ , see Supplementary Fig. 2). Specifically, we found that  
129 participants were biased towards self-information under high time pressure ( $b_0 = 1.395$ ,  $SE =$   
130  $0.332$ ,  $z = 4.198$ ,  $p < .001$ ) but not when they had more time to decide ( $b_0 = 0.612$ ,  $SE = 0.331$ ,  $z$   
131  $= 1.848$ ,  $p = .065$ ), replicating our findings reported with continuous gaze measures.

132           Additionally, we found marginally a significant correlation between fixation biases  
133 (proportion of first fixations on self-information – proportion of first fixations on other-  
134 information) under high time pressure and changes in these biases from high to low time  
135 pressure (Pearson's  $r = -0.225$ ,  $t_{55} = -1.710$ ,  $p = .093$ ). Here, we similarly found that individual  
136 differences in first fixation biases emerged under time pressure and were mitigated with time,  
137 consistent with analyses using continuous gaze measures. Unlike analyses using continuous  
138 gaze, we also found a significant correlation between fixation biases under low time pressure and  
139 changes in these biases from low to high time pressure (Pearson's  $r = -0.313$ ,  $t_{55} = -2.445$ ,  $p =$   
140  $.018$ ). We speculate that this association is due to individuals who already possess strong biases  
141 under low time pressure becoming more noisy in their attention-allocation and regressing to the  
142 mean. However, this is not inconsistent with our hypotheses regarding the emergence of unique

143 attentional biases under time pressure. Moreover, it contradicts previous work suggesting  
144 individuals become more extreme in their biases under time pressure.

145       Most importantly, we replicate the effects of attention on generous choice. A logistic  
146 mixed-effects model predicting generosity revealed a marginally significant interaction between  
147 time pressure and fixation biases ( $b = -0.133$ ,  $SE = 0.0709$ ,  $z = -1.878$ ,  $p = .060$ , see  
148 Supplementary Fig. 3). Specifically, individual differences in fixation biases strongly predicted  
149 generosity under high time pressure ( $b = -0.345$ ,  $SE = 0.115$ ,  $z = -2.989$ ,  $p = .003$ ), but not as  
150 strongly under low time pressure ( $b = -0.212$ ,  $SE = 0.113$ ,  $z = -1.872$ ,  $p = .061$ ).

151       Thus, we found robust support for our model suggesting that attention drives time  
152 pressure's effect on generosity whether we used continuous temporal measures of early attention  
153 or fixation-based measures.

154

155



#### 156 **Supplementary Note 4**

157           We argue in this paper that attentional deployment may explain changes in choice  
158 resulting from time pressure. However, alternative models have also been proposed. In  
159 particular, Chen & Krajbich (2018) recently proposed a model of biased decision-making in  
160 which individuals begin with a predisposition to respond generously or selfishly, which the  
161 authors capture using a “generosity bias” parameter for the starting point of the evidence-  
162 accumulation process<sup>1</sup>. In other words, some people may begin with a bias to respond selfishly,  
163 counteracting such bias only if sufficient evidence accumulates in favour of a generous response.  
164 Generous individuals start with the reverse bias. Using a static model of evidence-accumulation,  
165 Chen & Krajbich found that fitted values of a generosity bias in free response conditions were  
166 correlated with whether an individual became more extreme under time pressure or more  
167 moderate under time delay.

168           Although this model provides a simple and attractive mechanism for implementing a  
169 form of dual-process model, we suspected that attentional gaze dynamics could, if left  
170 unmodeled, be recovered as choice biases. Here, we provide two pieces of evidence that this may  
171 be the case.

172           First, we confirmed through simulations that fitting a static model with a starting bias to a  
173 true model in which early gaze-biases the drift would, indeed, result in erroneous attribution of  
174 changes in time pressure to a starting bias. To do so, we simulated 200 choice trials (100 high,  
175 100 low time pressure) for each of 20 hypothetically selfish ( $w_{self} = .03$ ,  $w_{other} = .02$ ) and 20  
176 hypothetically generous ( $w_{self} = .02$ ,  $w_{other} = .03$ ) participants, who attended either to self or other  
177 information first and oscillated between the information sources every 200ms. In these  
178 simulations, subjects’ social preference and attentional priorities were orthogonal. Thresholds for

179 all simulations were fixed at  $b = .16$ , and time pressure was simulated using a collapse rate  $d = 0$   
180 in the low time pressure condition and  $d = .8$  in the high time pressure condition. We added  
181 300ms to the resulting reaction times to account for motor and perceptual processing.  
182 Importantly, none of the simulations included true starting point biases. In other words, we  
183 simulated a model in which eye-gaze was the true driver of changes in choice under time  
184 pressure, and examined how such a mechanism influenced recovered parameters from an  
185 incorrect, static model of choice.

186 To this end, we used the Hierarchical Drift-Diffusion Modelling (HDDM)<sup>2</sup> package to  
187 implement a *social bias model* including weights on self, other,  $ndt$ ,  $b$ ,  $stbias$  and  $genbias$   
188 parameters. The *social bias model* assumes that changes in generosity under time pressure reflect  
189 limitations on static evidence-accumulation, (i.e. reductions in  $b$ ) that exacerbate the effects of  
190 existing social predispositions (i.e.  $genbias$ ). Thus, we fixed the weights and biases across time  
191 pressure conditions during model-fitting.

192 Results suggest that the fitted model explained the simulated data well, accurately  
193 predicting inter-individual differences in changes in generosity and RTs across time pressure  
194 conditions (Generosity: Pearson's  $r = 0.702$ ,  $t_{38} = 6.087$ ,  $p < .001$ ; RTs: Pearson's  $r = 0.487$ ,  $t_{38}$   
195  $= 3.44$ ,  $p < .01$ ), and intra individual differences in choices across different trial types under both  
196 high and low time pressure (High time pressure: mean Pearson's  $r = 0.852$ ,  $SE = 0.0145$ ,  $t_{39} =$   
197  $58.70$ ,  $p < .001$ ; Low time pressure: Pearson's  $r = 0.913$ ,  $SE = 0.0070$ ,  $t_{39} = 130.00$ ,  $p < .001$ ).  
198 The model also predicted intra-individual differences in RTs moderately well under both high  
199 and low time pressure (High time pressure: mean Pearson's  $r = 0.477$ ,  $SE = 0.0482$ ,  $t_{39} = 9.91$ ,  $p$   
200  $< .001$ ; Low time pressure: Pearson's  $r = 0.755$ ,  $SE = 0.216$ ,  $t_{39} = 35.00$ ,  $p < .001$ ,

201 Supplementary Fig. 4). Thus, our simulations suggest that a researcher fitting a static model  
202 would conclude that the model fit the data reasonably accurately.

203         Turning to the recovered parameters, we found that the static social bias model accurately  
204 recovered the true simulated weight parameters,  $w_{\text{self}}$  (Pearson's  $r = 0.882$ ,  $t_{38} = 11.596$ ,  $p <$   
205  $.001$ ) and  $w_{\text{other}}$  (Pearson's  $r = 0.911$ ,  $t_{38} = 13.679$ ,  $p < .001$ ). However, a logistic mixed-effects  
206 model erroneously suggested that the retrieved *genbias* parameters interacted with time pressure  
207 to predict generosity (Interaction effect:  $b = 6.959$ ,  $SE = 1.357$ ,  $z = -5.130$ ,  $p < .001$ ), with  
208 *genbias* parameters more predictive of generosity under high time pressure (simple effect of  
209 *genbias*: High Time Pressure:  $b = 6.313$ ,  $SE = 2.419$ ,  $z = 2.610$ ,  $p < .01$ ; Low Time Pressure:  $b =$   
210  $-0.646$ ,  $SE = 2.392$ ,  $z = -0.270$ ,  $p = .79$ ). While this replicated findings reported by Chen &  
211 Krajbich, we found that the average *genbias* parameters were also highly correlated with the  
212 initial piece of information attended (Pearson's  $r = 0.875$ ,  $t_{38} = 11.171$ ,  $p < .001$ ), suggesting that  
213 generosity biases were largely tracking variance induced by attentional dynamics rather than  
214 true, pre-determined response biases.

215         The above simulations suggest that, if the true model of choice behaviour involves  
216 dynamic changes in biased evidence-accumulation due to eye-gaze, a static model might mis-  
217 identify eye-gaze with starting point biases. We thus sought to determine whether such a  
218 correlation existed in our own data. To test this possibility, we also fit the *social bias model* to  
219 choice and reaction time data within our experiment using the HDDM package. All fits of the  
220 data using HDDM excluded trials in which no responses were recorded.

221         As expected, generosity biases recovered by the model were correlated with participant's  
222 average early gaze-biases (Pearson's  $r = -0.460$ ,  $t_{48} = -3.596$ ,  $p < .001$ ). Furthermore, as in the  
223 simulated data, a logistic mixed-effects regression also identified *genbias* parameters interacting

224 with time pressure to predict generosity in the experimental data ( $b = -3.149$ ,  $SE = 1.384$ ,  $z = -$   
225  $2.276$ ,  $p < .05$ ), erroneously suggesting that generosity under time pressure was more strongly  
226 driven by intuitive social biases (simple effect of *genbias*: High Time Pressure:  $b = 6.972$ ,  $SE =$   
227  $1.622$ ,  $z = 4.298$ ,  $p < .001$ ; Low Time Pressure:  $b = 3.824$ ,  $SE = 1.577$ ,  $z = 2.424$ ,  $p < .05$ ). Taken  
228 together, our results provide support for the idea that early gaze-biases, if not explicitly modeled,  
229 could yield erroneous identification of a social response bias.

230

231 **Supplementary Note 5**

232 To investigate the relationship between one-shot continuous generation games<sup>3,4</sup>, that  
233 have shown intuitive biases to drive behavior under time pressure, and iterative binary choice  
234 games that we used in Study 1, we used both tasks to measure generous behavior in Study 2 (see  
235 Supplementary Fig. 1 & 3). Participants in Study 2 were randomly assigned to one of two groups  
236 and completed 5 trials of an anonymous one-shot dictator game prior to the binary-choice tasks.  
237 In this section, they were given varying sums of money (\$100, \$50, \$20, \$10, \$2) and asked to  
238 indicate how much they would allocate to their partner on a sliding scale (see Supplementary  
239 Fig. 5). In one group, participants had to make these choices within 10s (high time pressure:  
240 N=100) while participants in the other group had to consider the choice for 10s before they were  
241 allowed to submit their choice (low time pressure: N=100). Participants always encountered the  
242 trial where the sum was \$100 first. The subsequent trials were randomly ordered. We only report  
243 the results of analyses conducted on only the first trial of the one-shot game, but analyses of the  
244 average generosity across the five trials show similar patterns of effects

245 Importantly we find that generosity measured in the binary choice dictator game was  
246 associated with generosity measured in the one-shot analog (Pearson's  $r = 0.447$ ,  $t_{198} = 7.029$ ,  $p$   
247  $< .001$ ). Additionally, to ensure that time pressure manipulations that vary across these two  
248 measures (continuous generation:  $< 10s$ ; binary choice:  $< 1.5-2s$ ) exert their effects on the same  
249 underlying process, we looked for associations between generosity in the binary choice games  
250 and continuous games for matching conditions. Specifically, generosity in the binary-choice  
251 game under *high time pressure* was highly predictive of generosity in the continuous one-shot  
252 game under *high time pressure* (Pearson's  $r = 0.493$ ,  $t_{98} = 5.614$ ,  $p < .001$ ). Similarly, generosity  
253 in the binary-choice game under *low time pressure* was highly predictive of generosity in the

254 continuous one-shot game under *low time pressure* (Pearson's  $r = 0.413$ ,  $t_{98} = 4.491$ ,  $p < .001$ ).

255 However, although correlations were technically higher in the matching conditions, they were

256 not significantly higher than those in the non-matching conditions (binary *low* predicting

257 continuous *high*: Pearson's  $r = 0.456$ ,  $t_{98} = 5.072$ ,  $p < .001$ ; Difference in dependent correlations:

258 Fisher's  $t = 0.95$ ,  $p = .34$ ; binary *high* predicting continuous *low*: Pearson's  $r = 0.398$ ,  $t_{98} = 4.293$

259  $p < .001$ ; Difference in dependent correlations: Fisher's  $t = -0.34$ ,  $p = .73$ ), likely due to high

260 within-individual correlations between generosity in the binary-choice game for both low and

261 high time pressure conditions (Pearson's  $r = 0.892$ ,  $t_{198} = 27.768$ ,  $p < .001$ ). Together, these

262 results suggest that the different paradigms tap into a similar construct of social preferences and

263 process of choice.

264

265 **Supplementary Note 6**

266 To investigate whether the low time pressure condition prompted individuals to more  
267 extensively deliberate about choice attributes prior to choosing, we conducted additional  
268 analyses on the eye tracking data. Firstly, we find that participants made a larger overall number  
269 of fixations to self and other information (Poisson mixed-effects regression on number of  
270 fixations per trial:  $b_{\text{low- high time pressure}} = 1.062$ ,  $SE. = 0.0431$ ,  $z = 24.60$ ,  $p < .001$ ). Additionally, the  
271 durations of those fixations were longer (linear mixed-effects regression on log-transformed  
272 average duration of fixations per trial:  $b_{\text{low- high time pressure}} = 0.328$ ,  $SE. = .0259$ ,  $t_{55} = 12.7$ ,  $p <$   
273  $.001$ ), when they had more time. This suggests that participants processed more choice  
274 information and/or processed the information more fully. Moreover, if people simply stopped  
275 deliberating at some point in the free time condition, we would expect a marked rise in fixations  
276 in non-AOI regions of the screen over time, and yet this is not what we observe. Gaze remains  
277 predominantly fixated on either self or other information until  $\sim 7$ s where more than 95% of trials  
278 have terminated, suggesting extended deliberation of both self and other outcomes under time-  
279 delay (Supplementary Fig. 6).

280

281

## 282 **Supplementary Note 7**

283 To rule out the effects of block order in explaining our pattern of effects, we re-ran all  
284 major analyses for a subset of data, blocks 4 through 7. Since all participants encountered low  
285 then high time pressure blocks in an alternating fashion, this subset of data reverses the block  
286 order. Importantly, we replicated both our finding that time pressure leads to slightly more  
287 selfish behavior ( $M = 0.0547$ ,  $t_{59} = 3.32$ ,  $p = 0.0016$ , see Supplementary Fig. 7 for block  
288 averages) and that these effects vary as a function of individual differences where generosity  
289 under time pressure predicts changes in generosity with time (Pearson's  $r = -0.326$ ,  $t_{58} = -2.624$ ,  $p$   
290  $= 0.011$ ). Specifically, generous individuals under time pressure became less generous with time  
291 while selfish individuals under time pressure became less selfish. We also find evidence for  
292 generosity under low time pressure predicting change in generosity (Pearson's  $r = -0.269$ ,  $t_{58} = -$   
293  $2.13$ ,  $p = 0.038$ ). However, these effects were primarily driven by 2 outlier points ( $> 2SD$   
294 above/below mean). The correlation excluding these points failed to reach significance  
295 (Pearson's  $r = -0.200$ ,  $t = -1.53$ ,  $df = 56$ ,  $p = 0.132$ ).

296 For measures of gaze-biases, we similarly replicated both effects of time pressure on  
297 attention and the effect of individual differences. We found that time pressure increased self-  
298 oriented gaze-biases under time pressure ( $M = 0.159$ ,  $t_{56} = 4.556$ ,  $p < .001$ , see Supplementary  
299 Fig. 8 for block by block means). More importantly, individual differences in biases under time  
300 pressure become attenuated with time (Pearson's  $r = -0.600$ ,  $t_{55} = -5.567$ ,  $p < .001$ ) while we  
301 find no evidence of biases under low time pressure predicting changes in these biases (Pearson's  
302  $r = 0.122$ ,  $t_{55} = 0.908$ ,  $p = 0.37$ ).

303 Finally, we replicated the main effect of gaze-biases on choice such that looking at self-  
304 outcomes first predicted less generous choices ( $b = -0.498$ ,  $SE = 0.202$ ,  $z = -2.470$ ,  $p = 0.0135$ ,



305 semi-partial  $R^2 = 0.082$ ). As expected, we also found a main effect of time pressure on choice (b  
306  $= -0.075$ ,  $SE = 0.0367$ ,  $z = -2.031$ ,  $p = 0.042$ , semi-partial  $R^2 = 0.008$ ) such that individuals  
307 became more selfish under time pressure. Notably, we also found a marginally significant  
308 interaction between early gaze and time pressure ( $b = -0.174$ ,  $SE = 0.0963$ ,  $z = -1.804$ ,  $p = 0.071$ ,  
309 semi-partial  $R^2 = 0.014$ ), replicating our findings in the main manuscript, showing that early  
310 gaze has a stronger effect on choice under high time pressure compared to low time pressure.

311           Taken together, these analyses suggest that our findings are robust and are unlikely to be  
312 due to block order.

313

314

315

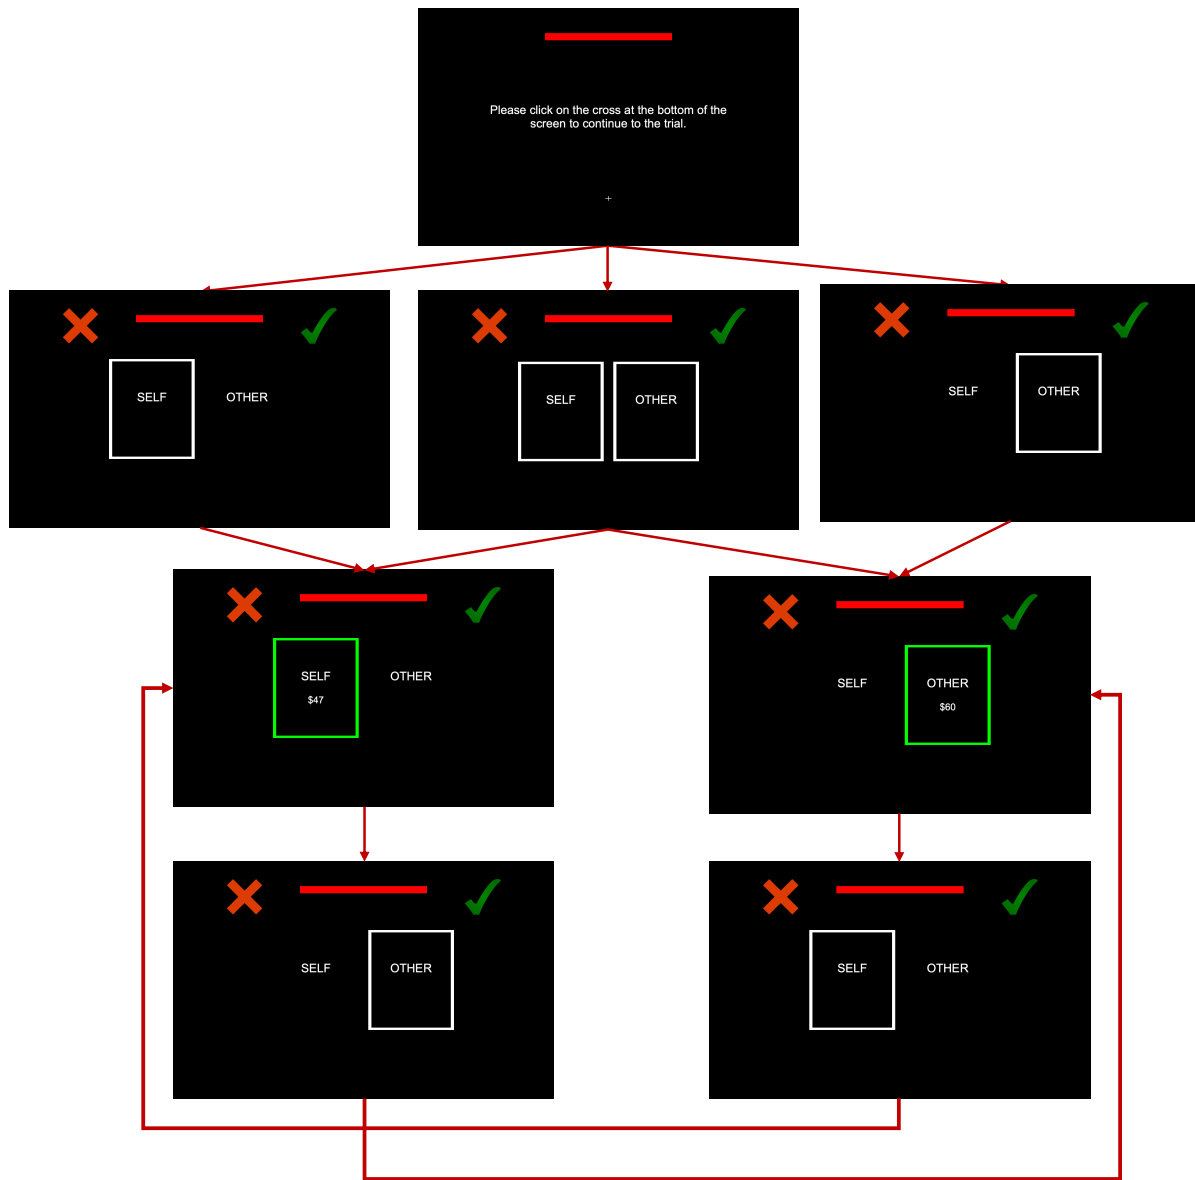

317  
318 **Supplementary Figure 1**

319 Study 2 modified dictator game schema.

320 Participants were forced to access self-outcomes in one-third of the trials, forced to access other-  
321 outcomes in another third of the trials and were allowed to choose which outcomes (self or other)  
322 they wished to look at. The available information was indicated by a white border and clicking  
323 within the border revealed the respective outcomes for a short period of time. The other piece of  
324 information that was previously not accessed was then made available and participants oscillated  
325 between the two pieces of information until they made a choice or the time limit had elapsed.

326

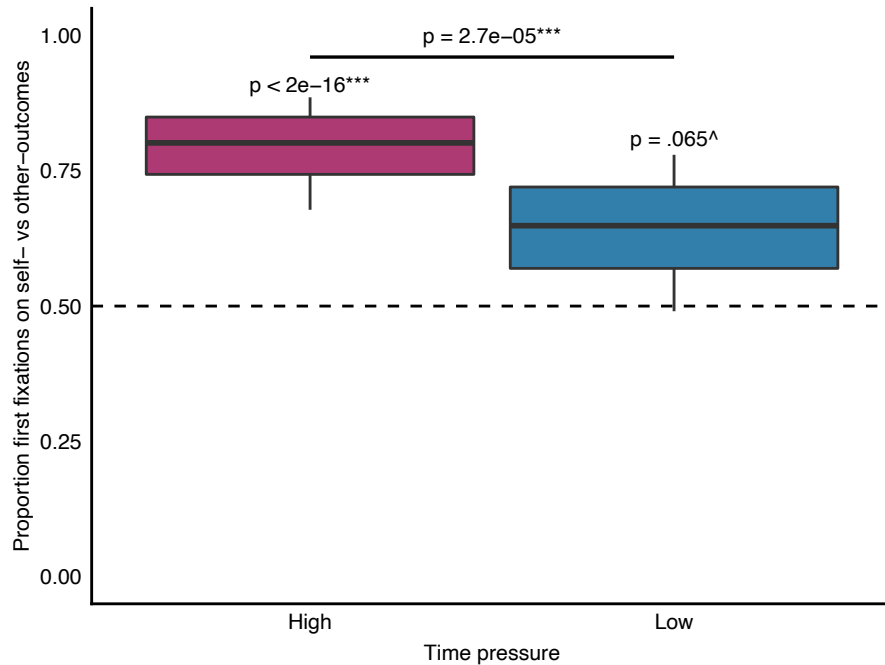

327  
 328  
 329  
 330  
 331  
 332  
 333  
 334  
 335  
 336  
 337

**Supplementary Figure 2**

Effects of time pressure on mean biases in early attention.

Central line in the boxplot indicate the mean first fixation bias towards self- relative to other-information with the upper and lower boundary of the box reflecting one standard error above and below the mean while the whiskers illustrate the 95% confidence interval of the estimate.

The dashed line denotes an unbiased fixation pattern (i.e. equal probability of fixating on self-information or other-information first). N = 57 subjects were included in this paired t-test.  $\hat{p} < .10, *p < .05, **p < .01, ***p < .001$

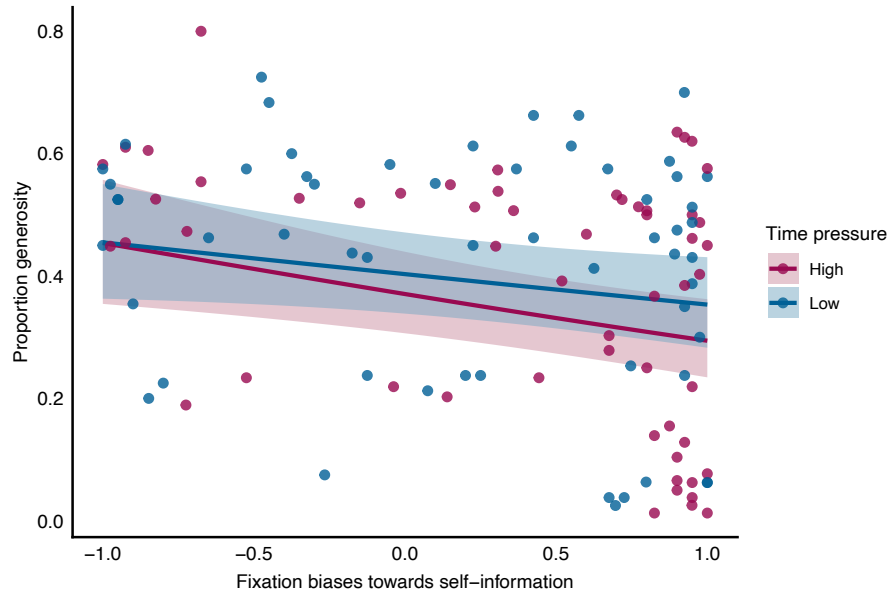

338  
339  
340  
341  
342  
343  
344

**Supplementary Figure 3**

Time pressure moderates the effects of fixation biases on generosity.

Each point represents a single subject ( $N = 57$ ), colored by time pressure condition. Solid lines represent the predicted group averages extracted from the general linear model. Shaded regions represent the 95% confidence interval of the predicted values, colored by time pressure condition.

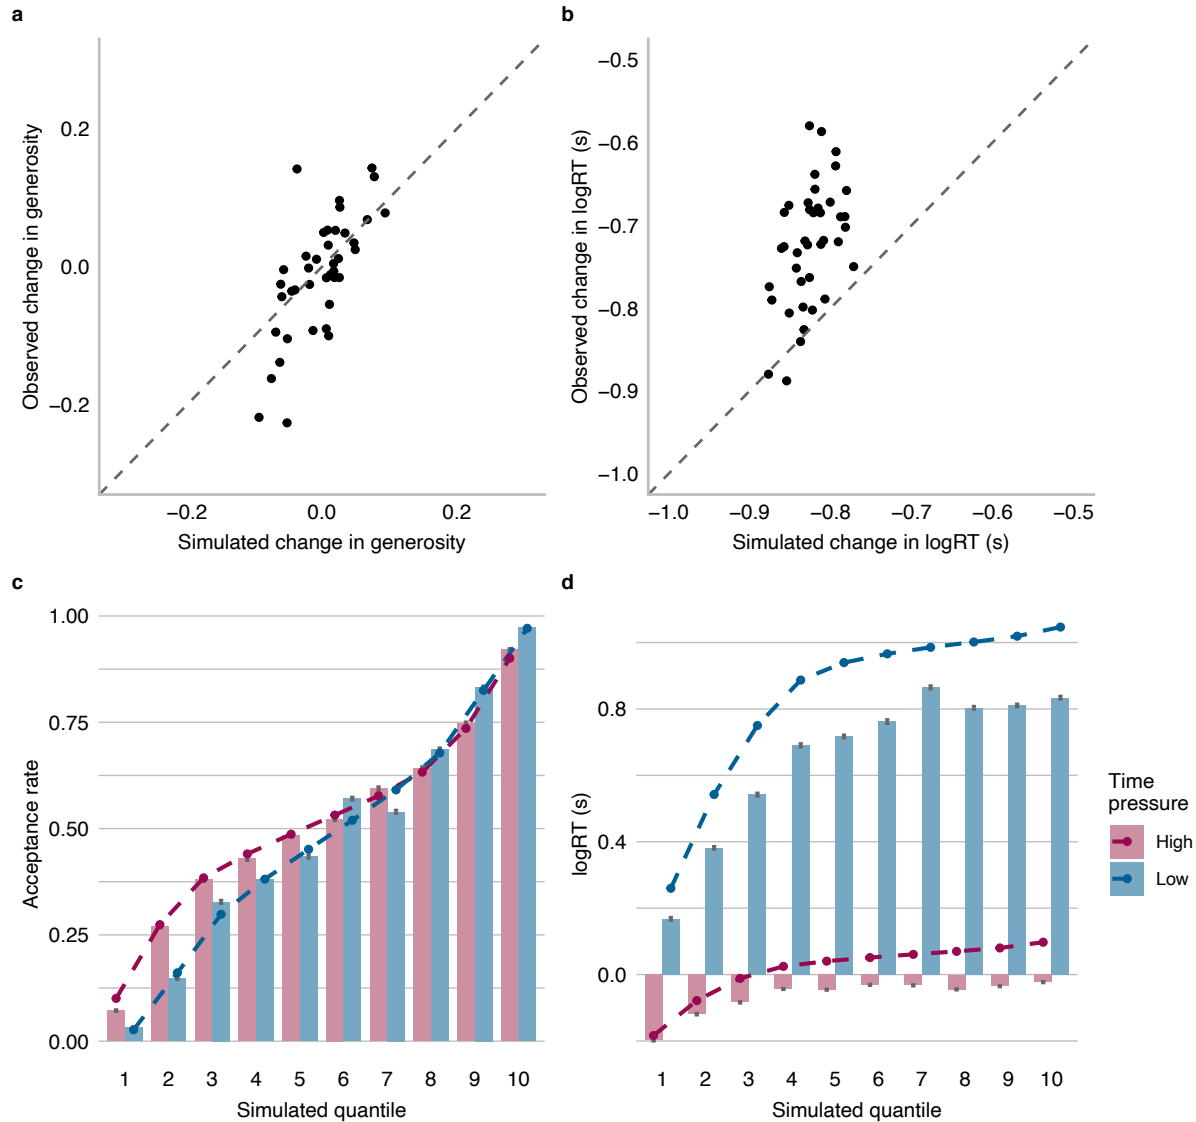

345  
 346  
 347  
 348  
 349  
 350  
 351  
 352  
 353  
 354  
 355  
 356

### Supplementary Figure 4

Simulation accuracy of the simple DDM.

Simulated versus observed individual differences in **a**) change in proportion generosity under time pressure, and **b**) change in logRT under time pressure. Each point represents a subject (N=40), and points on the dashed line indicate perfect simulation of the model. Bottom panels illustrate simulated versus observed intra-individual differences (N=40 subjects) in **c**) acceptance of proposed offers, and **d**) logRT, binned into ten model-predicted quantiles within individuals. Column height represents the observed group averages with error bars denoting one standard error above and below the group averages. Points on the dashed line represent the simulated averages within these quantiles across individuals.

## LOW TIME PRESSURE

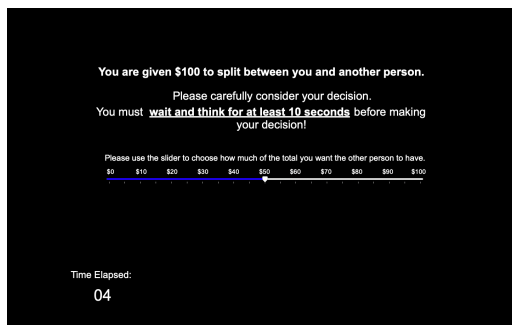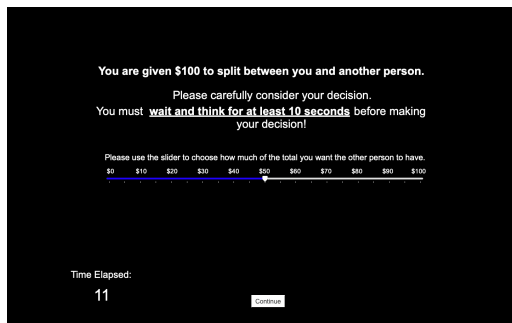

## HIGH TIME PRESSURE

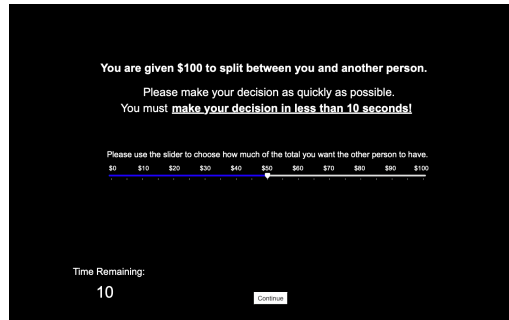

357  
358  
359  
360  
361  
362  
363  
364

### Supplementary Figure 5

Study 2 task schema of a one-shot continuous dictator game under low and high time pressure. The total sum of money given to split on each of the five trials varied (\$100, \$50, \$20, \$10, \$2). The scale was always initialized to the an even split and the continue button only appeared in the low time pressure condition after 10s have elapsed.

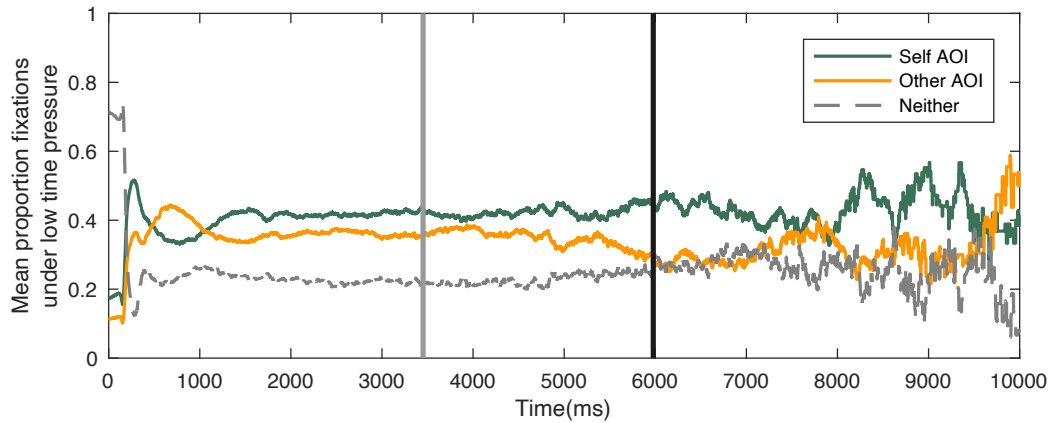

365  
 366  
 367  
 368  
 369  
 370  
 371  
 372

**Supplementary Figure 6**

Attention dynamics of altruistic choice across time.

Millisecond-to-millisecond proportion of gaze directed to Self AOI, Other AOI or neither under low time pressure, colored by AOI. The vertical lines represent points at which > 50% of trials (grey) and > 95% of trials (black) have terminated.

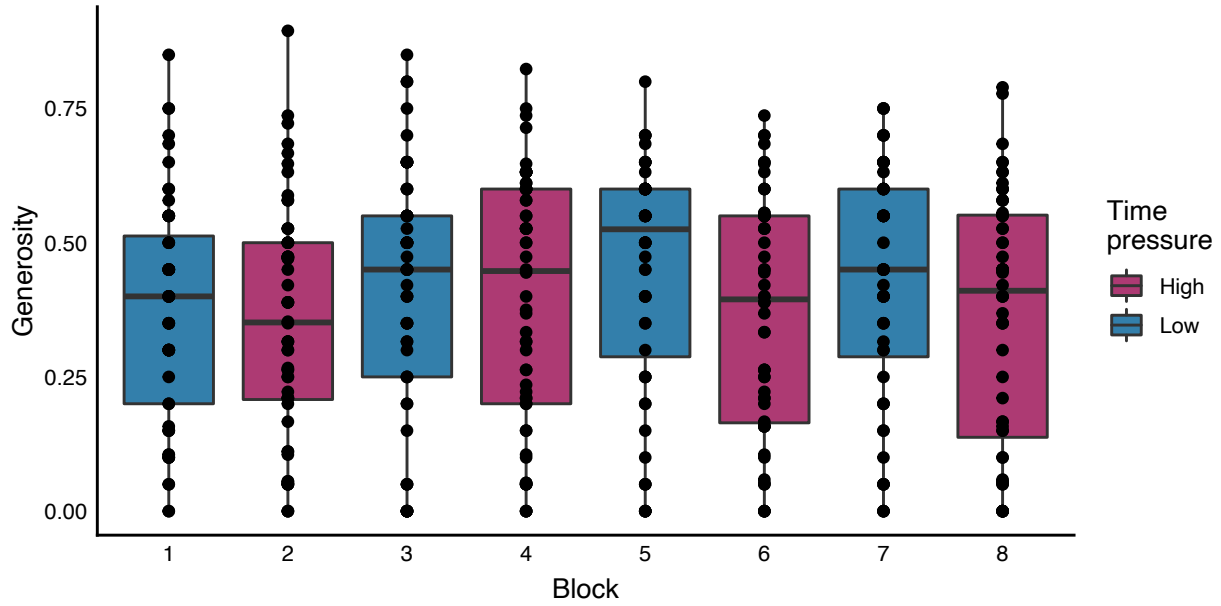

373  
 374  
 375  
 376  
 377  
 378  
 379  
 380

**Supplementary Figure 7**

Average generosity by block colored by time pressure condition. Each point represents a single subject (N=60). Central line of the box plot indicates the average generosity while the upper and lower bounds indicate one standard error above and below the mean. The whiskers represent the 95% confidence interval of the mean estimate.



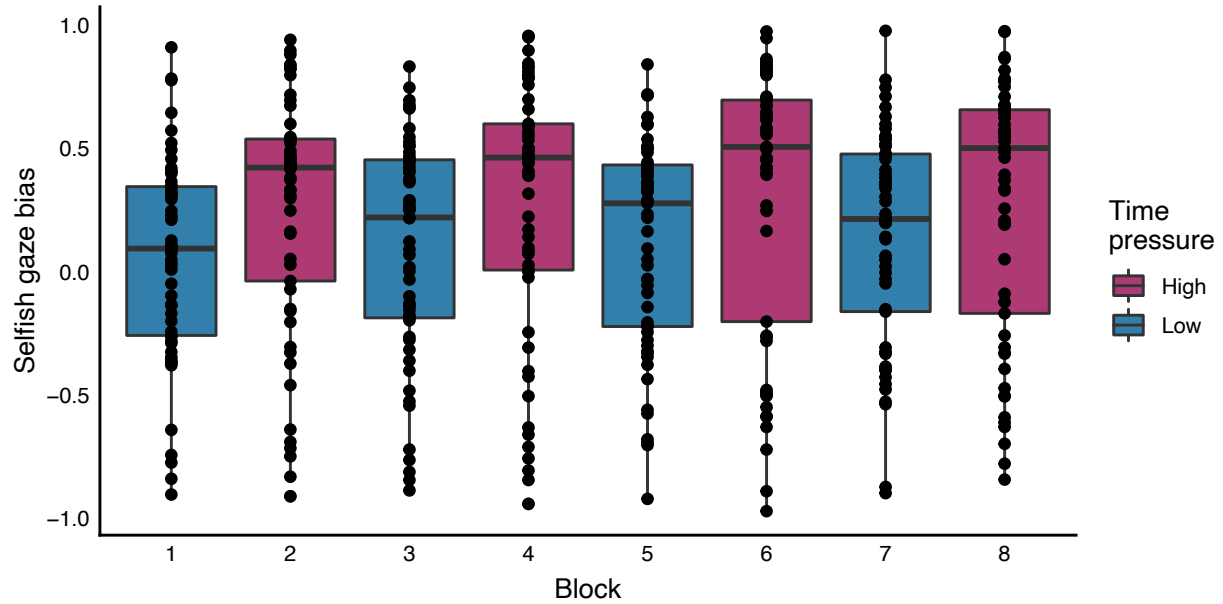

381  
 382  
 383  
 384  
 385  
 386  
 387  
 388  
 389

**Supplementary Figure 8**

Average selfish gaze-bias by block colored by time pressure condition. Positive values indicate a selfish gaze-bias while negative values indicate an other-oriented gaze bias. Each point represents a single subject (N=57). Central line of the box plot indicates the average generosity while the upper and lower bounds indicate one standard error above and below the mean. The whiskers represent the 95% confidence interval of the mean estimate.

390 **Supplementary Tables**

391 **Supplementary Table 1:** Logistic mixed-effects model showing individual differences in early

392 gaze predicting generosity.

| <b>Model predicting generosity</b>              |                   |           |          |                     |                                   |
|-------------------------------------------------|-------------------|-----------|----------|---------------------|-----------------------------------|
| <b>Predictors:</b>                              | <b>Statistics</b> |           |          |                     |                                   |
|                                                 | <b>b</b>          | <b>SE</b> | <b>z</b> | <b>two-tailed p</b> | <b>semi-partial R<sup>2</sup></b> |
| Intercept                                       | -0.4327           | 0.1367    | -3.165   | 0.00155**           | -                                 |
| Early gaze-biases<br>(+: selfish, -: prosocial) | -0.4944           | 0.1688    | -2.930   | 0.00339**           | 0.051                             |
| Time pressure<br>(1: High, -1: Low)             | -0.0706           | 0.0268    | -2.637   | 0.00837*            | 0.004                             |
| Late gaze-biases<br>(+: selfish, -: prosocial)  | -0.4562           | 0.2101    | -2.171   | 0.02989*            | 0.013                             |
| Early gaze-biases × Time pressure               | -0.1505           | 0.0716    | -2.103   | 0.03545*            | 0.005                             |
| Late gaze-biases × Time pressure                | 0.2128            | 0.1534    | 1.387    | 0.16542             | 0.003                             |

393

**Supplementary Table 2:** Pairwise comparison of gaze-informed ADDM parameters between low and high time pressure conditions.

| <b>Parameters</b>           | <b>M<sub>high</sub></b> | <b>M<sub>low</sub></b> | <b>M<sub>diff</sub></b> | <b>SE</b> | <b>t</b> | <b>df</b> | <b>two-tailed p (uncorrected)</b> |
|-----------------------------|-------------------------|------------------------|-------------------------|-----------|----------|-----------|-----------------------------------|
| <i>W<sub>self</sub></i>     | 0.0136<br>(0.0137)      | 0.0087<br>(0.0062)     | 0.00486                 | 0.00146   | 3.335    | 49        | 0.0016                            |
| <i>W<sub>other</sub></i>    | 0.0044<br>(0.0180)      | 0.0036<br>(0.0066)     | 0.00075                 | 0.00199   | 0.378    | 49        | 0.7068                            |
| <i>W<sub>fairness</sub></i> | 0.0066<br>(0.0076)      | 0.0031<br>(0.0027)     | 0.00348                 | 0.00091   | 3.849    | 49        | 0.0003                            |
| <i>b</i>                    | 0.322<br>(0.104)        | 0.396<br>(0.078)       | -0.0734                 | 0.0157    | -4.661   | 49        | < .0001                           |
| <i>d</i>                    | 1.464<br>(0.420)        | 0.203<br>(0.098)       | 1.2611                  | 0.0603    | 20.929   | 49        | < .0001                           |
| <i>stbias</i>               | -0.0128<br>(0.0785)     | 0.0308<br>(0.1150)     | -0.0436                 | 0.0179    | -2.439   | 49        | 0.0183                            |
| <i>genbias</i>              | -0.0496<br>(0.1129)     | -0.0258<br>(0.1073)    | -0.0238                 | 0.0201    | -1.185   | 49        | 0.2417                            |
| <i>θ</i>                    | 0.4078<br>(0.232)       | 0.500<br>(0.249)       | -0.0924                 | 0.0420    | -2.201   | 49        | 0.0324                            |

**Supplementary Table 3:** General linear model showing individual differences in social preferences predicting early gaze-biases.

| <b>Model predicting average early gaze-biases</b>   |                   |           |          |           |                     |                                   |
|-----------------------------------------------------|-------------------|-----------|----------|-----------|---------------------|-----------------------------------|
| <b>Predictors:</b>                                  | <b>Statistics</b> |           |          |           |                     |                                   |
|                                                     | <b>b</b>          | <b>SE</b> | <b>t</b> | <b>df</b> | <b>two-tailed p</b> | <b>semi-partial R<sup>2</sup></b> |
| Intercept                                           | 0.3734            | 0.0934    | 3.998    | 47        | 0.0002***           | -                                 |
| Average $w_{self}$                                  | -11.3311          | 6.5968    | -1.718   | 47        | 0.0924              | 0.053                             |
| Average $w_{other}$                                 | -12.8192          | 5.2944    | -2.421   | 47        | 0.0194*             | 0.101                             |
| Time pressure<br>(Effect-coded: High = 1, Low = -1) | 0.0733            | 0.0277    | 2.649    | 47        | 0.0109*             | 0.012                             |
| Average $w_{self} \times$ Time pressure             | 2.6368            | 1.9535    | 1.350    | 47        | 0.1836              | 0.003                             |
| Average $w_{other} \times$ Time pressure            | -3.6561           | 1.5678    | 2.332    | 47        | 0.0240*             | 0.009                             |

**Supplementary Table 4:** General linear model showing individual differences in social preferences interacting with attention to produce changes in generosity under time pressure.

| Model predicting changes in generosity                                 |                                                                        |            |         |                 |              |                             |
|------------------------------------------------------------------------|------------------------------------------------------------------------|------------|---------|-----------------|--------------|-----------------------------|
| Predictors:                                                            |                                                                        | Statistics |         |                 |              |                             |
| Full model                                                             | Selected model                                                         | b          | SE      | t <sub>38</sub> | two-tailed p | semi-partial R <sup>2</sup> |
| Intercept                                                              | Intercept                                                              | -0.0098    | 0.0280  | 0.351           | 0.727        | -                           |
| Average w <sub>self</sub>                                              | Average w <sub>self</sub>                                              | -2.1066    | 1.4837  | -1.420          | 0.164        | 0.050                       |
| Average w <sub>other</sub>                                             | Average w <sub>other</sub>                                             | -6.0767    | 2.8814  | -2.109          | 0.042*       | 0.105                       |
| Average early gaze (+; self-biased, - : other-biased)                  | Average early gaze                                                     | -0.3488    | 0.0483  | -0.722          | 0.475        | 0.014                       |
| Change in early gaze                                                   | Change in early gaze                                                   | -0.7342    | 0.6191  | -1.186          | 0.243        | 0.036                       |
| Average w <sub>other</sub> × Average early gaze                        | Average w <sub>other</sub> × Average early gaze                        | -5.3781    | -3.665  | -1.467          | 0.151        | 0.054                       |
| Average w <sub>other</sub> × Change in early gaze                      | Average w <sub>other</sub> × Change in early gaze                      | 1.5417     | 5.4673  | 0.282           | 0.780        | 0.002                       |
| Average early gaze × Change in early gaze                              | Average early gaze × Change in early gaze                              | 0.0010     | 0.1636  | 0.006           | 0.995        | 0.000                       |
| Average w <sub>other</sub> × Average early gaze × Change in early gaze | Average w <sub>other</sub> × Average early gaze × Change in early gaze | 33.2281    | 14.7726 | 2.249           | 0.030*       | 0.117                       |
| Average late gaze                                                      | Average late gaze                                                      | -0.0307    | 0.0679  | 0.451           | 0.654        | 0.005                       |
| Average w <sub>other</sub> × Average late gaze                         | Average w <sub>other</sub> × Average late gaze                         | -8.3620    | 6.0640  | -1.379          | 0.176        | 0.048                       |
| Change in w <sub>other</sub>                                           | Change in w <sub>other</sub>                                           | 3.6129     | 1.9966  | 1.809           | 0.078        | 0.079                       |
| Average w <sub>self</sub> × Average early gaze                         |                                                                        |            |         |                 |              |                             |
| Average w <sub>self</sub> × Change in early gaze                       |                                                                        |            |         |                 |              |                             |
| Average w <sub>self</sub> × Average early gaze × Change in early gaze  |                                                                        |            |         |                 |              |                             |
| Average w <sub>self</sub> × Average late gaze                          |                                                                        |            |         |                 |              |                             |
| Average w <sub>fairness</sub>                                          |                                                                        |            |         |                 |              |                             |
| Average genbias                                                        |                                                                        |            |         |                 |              |                             |
| Change in w <sub>self</sub>                                            |                                                                        |            |         |                 |              |                             |
| Change in w <sub>fairness</sub>                                        |                                                                        |            |         |                 |              |                             |

## Supplementary References

1. Chen, F. & Krajbich, I. Biased sequential sampling underlies the effects of time pressure and delay in social decision making. *Nat. Commun.* **9**, 3557 (2018).
2. Wiecki, T. V, Sofer, I. & Frank, M. J. HDDM: hierarchical bayesian estimation of the drift-diffusion model in python. *Front. Neuroinform.* **7**, 14 (2013).
3. Rand, D. G., Greene, J. D. & Nowak, M. A. Spontaneous giving and calculated greed. *Nature* **489**, 427–430 (2012).
4. Bouwmeester, S. *et al.* Registered replication report: Rand, greene, and nowak (2012). *Perspect. Psychol. Sci.* **12**, 527–542 (2017).
